# Supplementary material for: Metformin attenuates the D-galactose-induced aging process via the UPR through the AMPK/ERK1/2 signaling pathways
Source: PubMed Central journal article supplement — Int J Mol Med. 2020 Jan 8;45(3):715–30. doi: 10.3892/ijmm.2020.4453 (PMC7015132; doi:10.3892/ijmm.2020.4453), 2020-01-08

Figure S2. Grouping of cultured neurons. Group1, D-gal+CC+metformin; group 2, D-gal+U0126+metformin; group 3, D-gal+metformin; group 4, D-gal-induced senescent PC12 cells; and group 5, control. D-galactose; Met, metformin; CC, compound C.

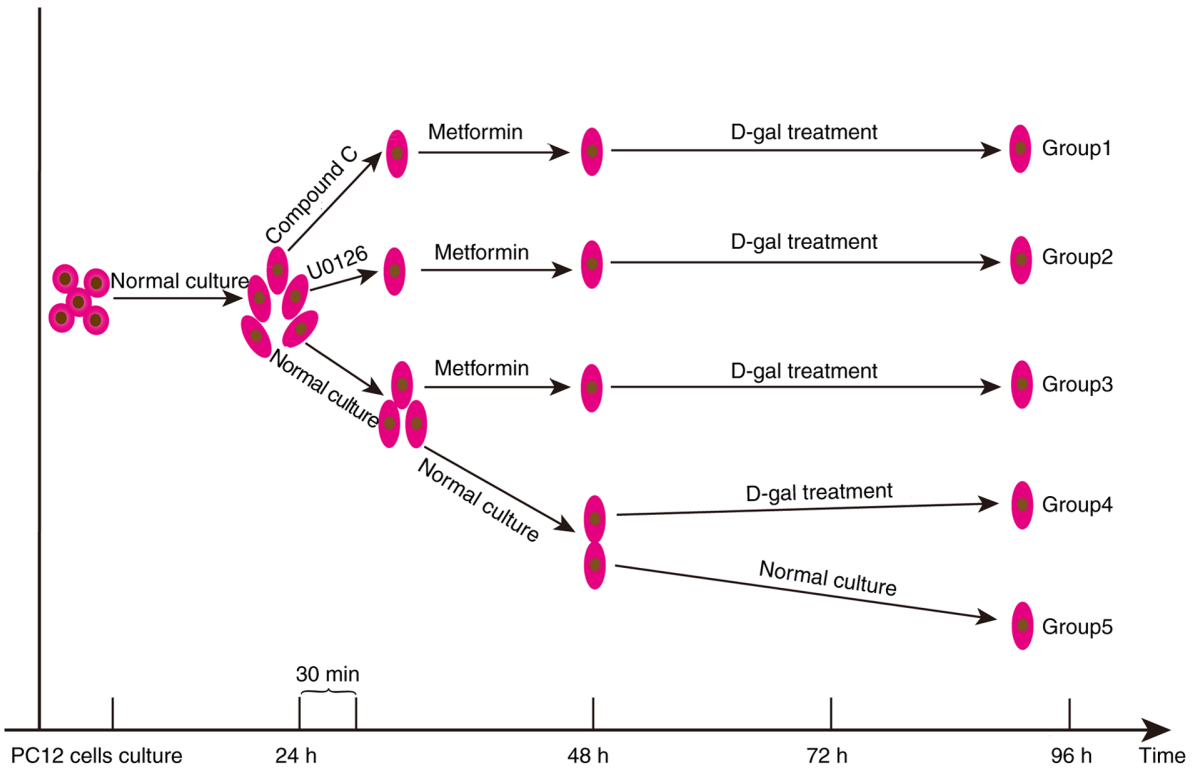

Figure S3. Determination of cellular activity in PC12 cells. The optimal concentration of D-gal was selected by the CCK-8 assay. The concentration of each drug did not affect cell viability. Cell viability was determined by CCK-8 assay after treatment with 20  $\mu$ M UO126, 20  $\mu$ M compound C, 100  $\mu$ M metformin or 15 mg/ml D-gal. Relative cell viabilities are expressed as the means  $\pm$  SD (n=6). D-galactose; Met, metformin. \*P<0.05, \*\*\*P<0.001.

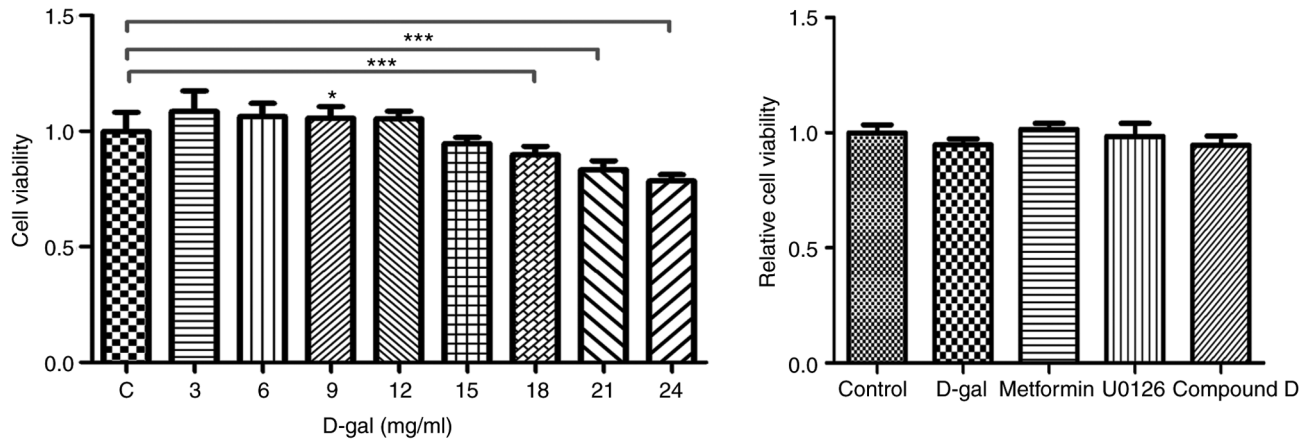

Supplement: Supplementary_Data.pdf [file Supplementary_Data.pdf]
